# Supplementary material for: Boosting electrocatalytic hydrogen evolution over a Mo2C–W2C heterostructure by interface-induced electron modulation
Source: Royal Society of Chemistry journal article supplement (doi:10.1039/d3ta07373d), 2024-01-01
Supplement: d3ta07373d1.pdf [file d3ta07373d1.pdf]

## **Electronic Supplementary Information**

### **Boosting electrocatalytic hydrogen evolution over Mo<sub>2</sub>C-W<sub>2</sub>C heterostructure by interface-induced electron modulation**

Lijuan Jiang, Ruijing Wang, Huimin Zhou, Guang-Feng Wei\*, Xuefeng Wang\*

Shanghai Key Lab of Chemical Assessment and Sustainability, School of Chemical  
Science and Engineering, Tongji University, Shanghai, 200092, P. R. China.

\*Corresponding Authors: [weigf@tongji.edu.cn](mailto:weigf@tongji.edu.cn); [xfwang@tongji.edu.cn](mailto:xfwang@tongji.edu.cn)

## Contents

|                                                                                                                                                                        |    |
|------------------------------------------------------------------------------------------------------------------------------------------------------------------------|----|
| <b>Table S1</b> Composition of samples obtained at different Mo/W feeding ratios. ....                                                                                 | 1  |
| <b>Fig. S1</b> SEM images of the Mo <sub>2</sub> C/RGO, Mo <sub>2</sub> C-W <sub>2</sub> C/RGO, Mo <sub>2</sub> C-W <sub>2</sub> C/RGO, and W <sub>2</sub> C/RGO. .... | 2  |
| <b>Fig. S2</b> EDS spectra .....                                                                                                                                       | 3  |
| <b>Fig. S3</b> Raman spectra of the GO and RGO.....                                                                                                                    | 3  |
| <b>Fig. S4</b> (a) Survey XPS spectra. High-resolution XPS profiles of (b) C 1s; (c) N 1s. ....                                                                        | 4  |
| <b>Fig. S5</b> (a) Polarization curves, (b) Tafel plots, (c) C <sub>dl</sub> , and (d) Nyquist plots in 0.5 M H <sub>2</sub> SO <sub>4</sub> .. ....                   | 5  |
| <b>Table S2</b> Comparison of catalytic parameters in 0.5 M H <sub>2</sub> SO <sub>4</sub> .. ....                                                                     | 6  |
| <b>Table S3</b> Comparison of HER performance for Mo <sub>2</sub> C-W <sub>2</sub> C/RGO with other reported carbon-based electrocatalysts. ....                       | 7  |
| <b>Table S4</b> Comparison of catalytic parameters of different HER catalysts in 0.5 M H <sub>2</sub> SO <sub>4</sub> .....                                            | 8  |
| <b>Fig. S6</b> The C <sub>dl</sub> of different materials in 0.5 M H <sub>2</sub> SO <sub>4</sub> .....                                                                | 9  |
| <b>Fig. S7</b> SEM image of Mo <sub>2</sub> C-W <sub>2</sub> C/RGO-0.56 after long-term durability test in 0.5 M H <sub>2</sub> SO <sub>4</sub> .....                  | 9  |
| <b>Table S5</b> Comparison of catalytic parameters of different HER catalysts in 1.0 M KOH.....                                                                        | 10 |
| <b>Fig. S8</b> (a) Polarization curves, (b) Tafel plots, (c) C <sub>dl</sub> , and (d) Nyquist plots in 1.0 M KOH. ....                                                | 11 |
| <b>Table S6</b> Comparison of catalytic parameters in 1.0 M KOH. ....                                                                                                  | 12 |
| <b>Fig. S9</b> The C <sub>dl</sub> of different materials in 1.0 M KOH.....                                                                                            | 12 |
| <b>Fig. S10</b> SEM image of Mo <sub>2</sub> C-W <sub>2</sub> C/RGO-0.56 after long-term durability test in 1.0 M KOH.....                                             | 13 |
| <b>Fig. S11</b> XRD patterns and SEM images of W <sub>2</sub> C, Mo <sub>2</sub> C and Mo <sub>2</sub> C-W <sub>2</sub> C.. ....                                       | 13 |
| <b>Fig. S12</b> (a) Polarization curves in 0.5 M H <sub>2</sub> SO <sub>4</sub> . (b) Polarization curves in 1.0 M KOH.....                                            | 14 |
| <b>Fig. S13</b> The density of states for Mo <sub>2</sub> C, W <sub>2</sub> C, Mo <sub>2</sub> C-W <sub>2</sub> C. ....                                                | 15 |
| <b>REFERENCES</b> .....                                                                                                                                                | 16 |

**Table S1.** Composition of samples obtained at different Mo/W feeding ratios.

| products                                    | $(\text{NH}_4)_6\text{Mo}_7\text{O}_{24}\cdot 4\text{H}_2\text{O}^{\text{a}}$ (g) | $(\text{NH}_4)_6\text{H}_2\text{W}_{12}\text{O}_{40}\cdot x\text{H}_2\text{O}^{\text{b}}$ (g) | Mo/W <sup>c</sup> | Mo/(Mo+W) <sup>d</sup> |
|---------------------------------------------|-----------------------------------------------------------------------------------|-----------------------------------------------------------------------------------------------|-------------------|------------------------|
| Mo <sub>2</sub> C-W <sub>2</sub> C/RGO-0.24 | 0.18                                                                              | 0.74                                                                                          | 0.33              | 0.24                   |
| Mo <sub>2</sub> C-W <sub>2</sub> C/RGO-0.56 | 0.36                                                                              | 0.50                                                                                          | 0.5               | 0.56                   |
| Mo <sub>2</sub> C-W <sub>2</sub> C/RGO-0.75 | 0.53                                                                              | 0.25                                                                                          | 3.0               | 0.75                   |

<sup>a</sup> Data was the molar amount of  $(\text{NH}_4)_6\text{Mo}_7\text{O}_{24}\cdot 4\text{H}_2\text{O}$  used in synthesis. <sup>b</sup> Data was the molar amount of  $(\text{NH}_4)_6\text{H}_2\text{W}_{12}\text{O}_{40}\cdot x\text{H}_2\text{O}$  used in synthesis. <sup>c</sup> Data was Mo/W feeding molar ratio. <sup>d</sup> Data was calculated from the result of EDS.

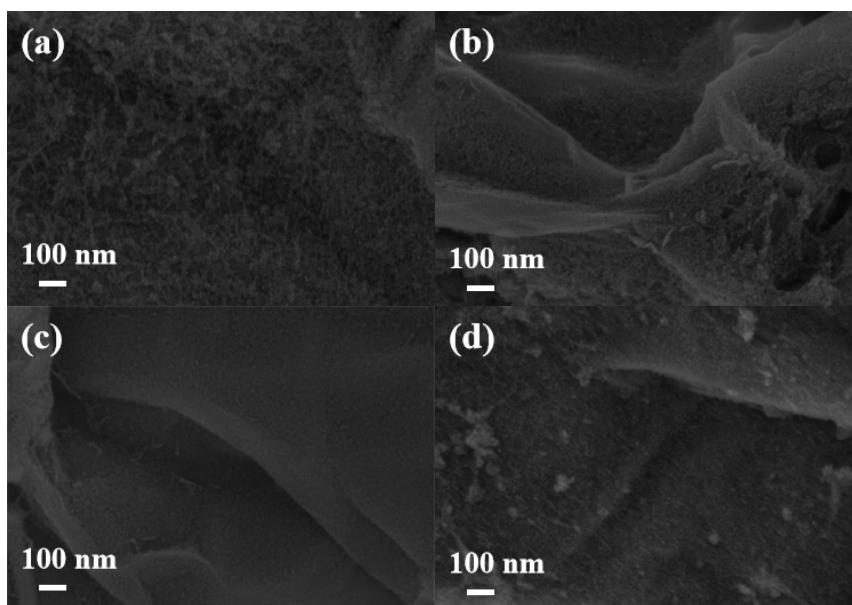

**Fig. S1** SEM images of (a)  $\text{Mo}_2\text{C}/\text{RGO}$ , (b)  $\text{Mo}_2\text{C}-\text{W}_2\text{C}/\text{RGO}-0.75$ , (c)  $\text{Mo}_2\text{C}-\text{W}_2\text{C}/\text{RGO}-0.24$ , and (d)  $\text{W}_2\text{C}/\text{RGO}$ .

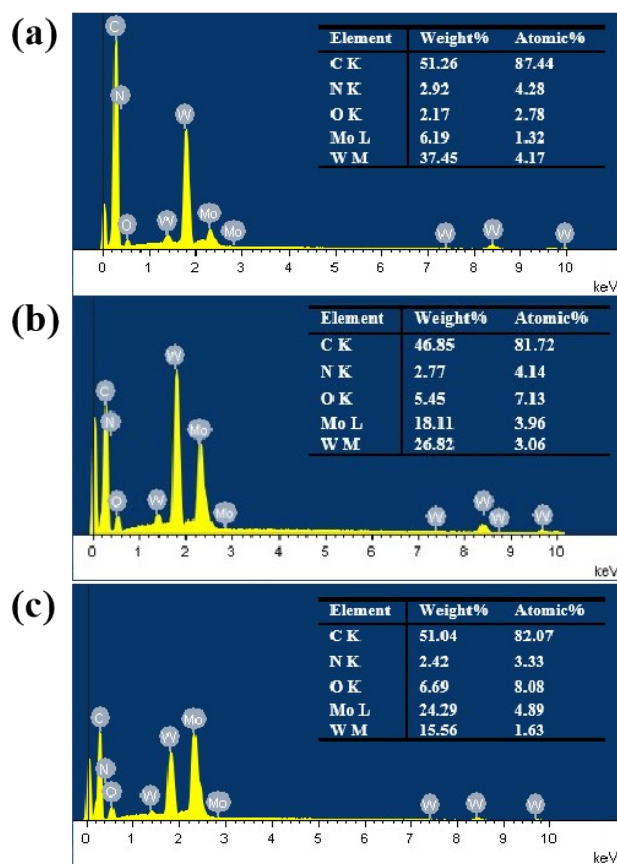

**Fig. S2** EDS spectra of (a)  $\text{Mo}_2\text{C-W}_2\text{C/RGO-0.24}$ , (b)  $\text{Mo}_2\text{C-W}_2\text{C/RGO-0.56}$ , and (c)  $\text{Mo}_2\text{C-W}_2\text{C/RGO-0.75}$ .

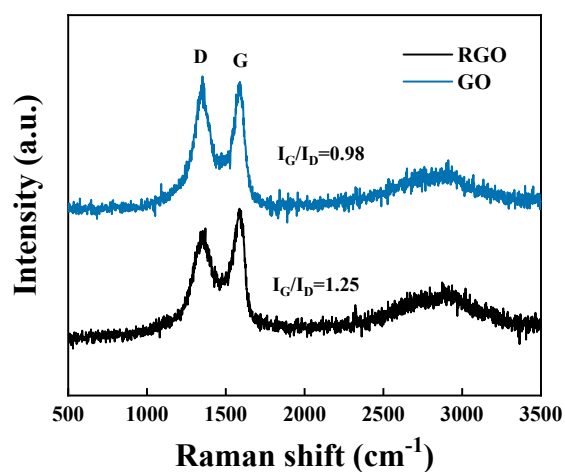

**Fig. S3** Raman spectra of the GO and RGO.

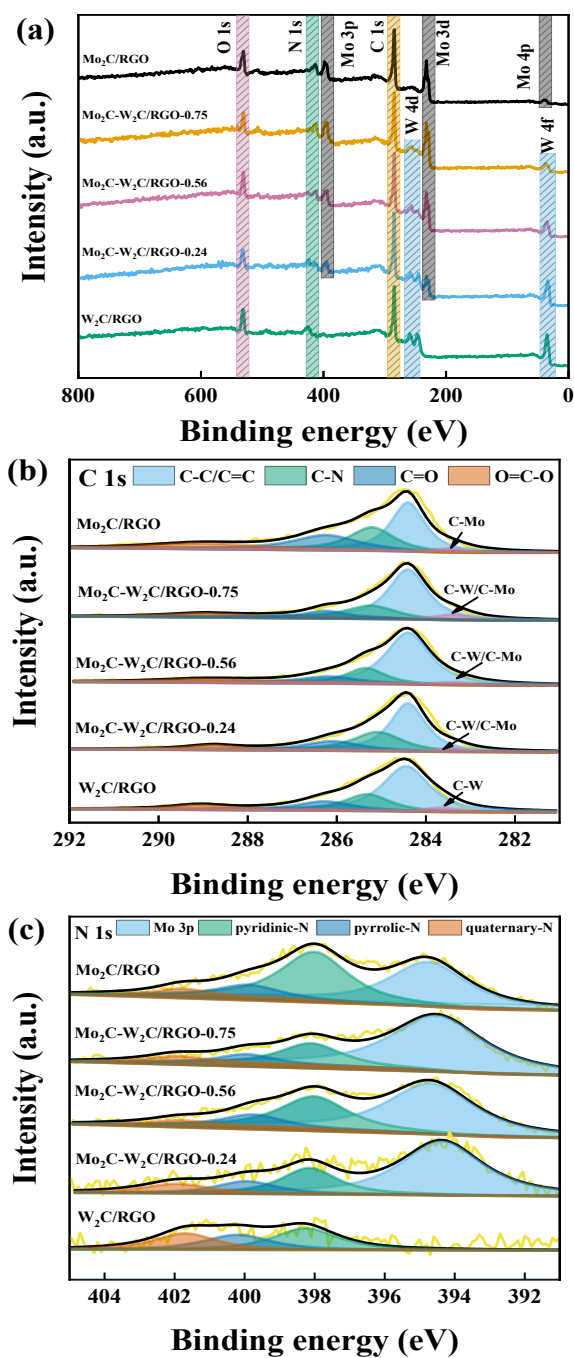

**Fig. S4** (a) Survey XPS spectra. High-resolution XPS profiles of (b) C 1s; (c) N 1s.

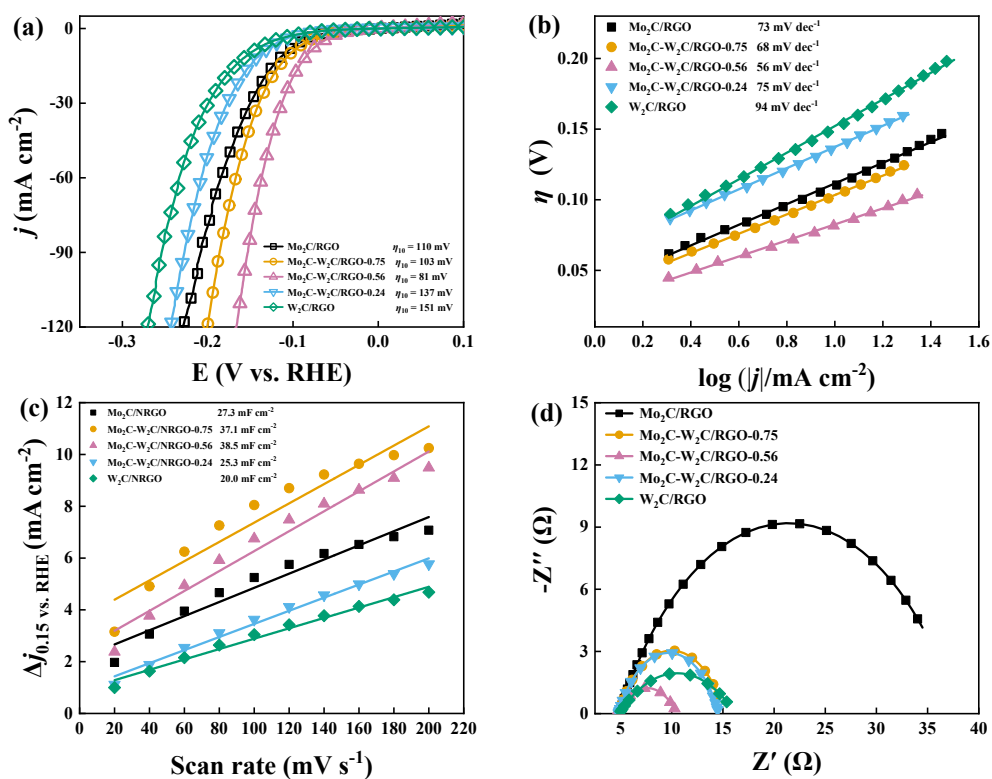

**Fig. S5** (a) Polarization curves and (b) Tafel plots of Mo<sub>2</sub>C/RGO, Mo<sub>2</sub>C-W<sub>2</sub>C/RGO-0.24, Mo<sub>2</sub>C-W<sub>2</sub>C/RGO-0.56, Mo<sub>2</sub>C-W<sub>2</sub>C/RGO-0.75, and W<sub>2</sub>C/RGO in 0.5 M H<sub>2</sub>SO<sub>4</sub>. (c) The  $C_{dl}$  of different materials obtained at 0.15 V versus RHE. (d) Nyquist plots (at  $\eta = 200$  mV).

**Table S2.** Comparison of catalytic parameters of Mo<sub>2</sub>C/RGO, Mo<sub>2</sub>C-W<sub>2</sub>C/RGO-0.75, Mo<sub>2</sub>C-W<sub>2</sub>C/RGO-0.56, Mo<sub>2</sub>C-W<sub>2</sub>C/RGO-0.24, and W<sub>2</sub>C/NRGO catalysts in 0.5 M H<sub>2</sub>SO<sub>4</sub>.

| Catalysts                                   | Onset potential<br>(mV vs RHE) | $\eta_{10}$<br>(mV vs RHE) | $j_0$<br>(mA cm <sup>-2</sup> ) | Tafel slope<br>(mV dec <sup>-1</sup> ) | $C_{dl}$<br>(mF dec <sup>-1</sup> ) | $R_{ct}$<br>( $\Omega$ ) |
|---------------------------------------------|--------------------------------|----------------------------|---------------------------------|----------------------------------------|-------------------------------------|--------------------------|
| Mo <sub>2</sub> C/RGO                       | 43                             | 110                        | 0.384                           | 73                                     | 27.3                                | 11.3                     |
| Mo <sub>2</sub> C-W <sub>2</sub> C/RGO-0.75 | 41                             | 103                        | 0.407                           | 68                                     | 37.1                                | 9.8                      |
| Mo <sub>2</sub> C-W <sub>2</sub> C/RGO-0.56 | 30                             | 81                         | 0.428                           | 56                                     | 38.5                                | 5.9                      |
| Mo <sub>2</sub> C-W <sub>2</sub> C/RGO-0.24 | 66                             | 137                        | 0.251                           | 75                                     | 25.3                                | 10.34                    |
| W <sub>2</sub> C/NRGO                       | 67                             | 151                        | 0.244                           | 94                                     | 20.0                                | 33.1                     |



**Table S3.** Comparison of HER performance for Mo<sub>2</sub>C-W<sub>2</sub>C/RGO with other reported carbon-based electrocatalysts.

| Catalyst                                       | Electrolyte                              | Tafel slope<br>(mV dec <sup>-1</sup> ) | $\eta_{10}$<br>(mV vs. RHE) | Ref.             |
|------------------------------------------------|------------------------------------------|----------------------------------------|-----------------------------|------------------|
| <b>Mo<sub>2</sub>C-W<sub>2</sub>C/RGO-0.56</b> | <b>0.5 M H<sub>2</sub>SO<sub>4</sub></b> | <b>56</b>                              | <b>81</b>                   | <b>This work</b> |
|                                                | <b>1.0 M KOH</b>                         | <b>59</b>                              | <b>87</b>                   |                  |
| Twinned WCN                                    | 1.0 M KOH                                | -                                      | 138                         | 1                |
|                                                | 0.5 M H <sub>2</sub> SO <sub>4</sub>     | 65                                     | 128                         |                  |
| W <sub>2</sub> C/WP@NC                         | 1.0 M KOH                                | 59.07                                  | 196.2                       | 2                |
|                                                | 0.5 M H <sub>2</sub> SO <sub>4</sub>     | 77.4                                   | 116.37                      |                  |
| W <sub>2</sub> C@CNT-S8                        | 1.0 M KOH                                | 56.2                                   | 148                         | 3                |
|                                                | 0.5 M H <sub>2</sub> SO <sub>4</sub>     | 57.4                                   | 176                         |                  |
| Mo <sub>2</sub> C@BNC                          | 1.0 M KOH                                | 57.4                                   | 145                         | 4                |
|                                                | 0.5 M H <sub>2</sub> SO <sub>4</sub>     | 68.3                                   | 184                         |                  |
| WC@C/NF                                        | 1.0 M KOH                                | 94.7                                   | 124                         | 5                |
|                                                | 0.5 M H <sub>2</sub> SO <sub>4</sub>     | -                                      | 208                         |                  |
| CoO/Mo <sub>2</sub> C                          | 1.0 M KOH                                | 80                                     | 107                         | 6                |
| Co/Mo <sub>2</sub> C@C                         | 1.0 M KOH                                | 68                                     | 98                          | 7                |
| Mo <sub>2</sub> N-Mo <sub>2</sub> C/HGr        | 1.0 M KOH                                | 68                                     | 154                         | 8                |
|                                                | 0.5 M H <sub>2</sub> SO <sub>4</sub>     | 55                                     | 157                         |                  |
| Mo <sub>2</sub> C/MoS <sub>2</sub> -rGO        | 1.0 M KOH                                | 52                                     | 112                         | 9                |
| WC-W <sub>2</sub> C/HCDs                       | 1.0 M KOH                                | 72.2                                   | 116                         | 10               |
|                                                | 0.5 M H <sub>2</sub> SO <sub>4</sub>     | 52.5                                   | 96                          |                  |
| Mo <sub>2</sub> C-CoO@N-CNFs-8                 | 1.0 M KOH                                | 76                                     | 115                         | 11               |
| Ni-W <sub>2</sub> C                            | 1.0 M KOH                                | 73.8                                   | 88                          | 12               |
| WS <sub>2</sub> /W <sub>2</sub> C@NSPC         | 1.0 M KOH                                | 72                                     | 205                         | 13               |
|                                                | 0.5 M H <sub>2</sub> SO <sub>4</sub>     | 68                                     | 126                         |                  |
| W-W <sub>2</sub> C/CNT-6                       | 1.0 M KOH                                | 51                                     | 147                         | 14               |
|                                                | 0.5 M H <sub>2</sub> SO <sub>4</sub>     | 56                                     | 155                         |                  |

**Table S4.** Comparison of catalytic parameters of different HER catalysts in 0.5 M H<sub>2</sub>SO<sub>4</sub>.

| Catalyst                                    | Onset potential<br>(mV vs RHE) | $\eta_{10}$<br>(mV vs RHE) | $j_0$<br>(mA cm <sup>-2</sup> ) | Tafel slope<br>(mV dec <sup>-1</sup> ) | $R_{ct}$ ( $\Omega$ ) |
|---------------------------------------------|--------------------------------|----------------------------|---------------------------------|----------------------------------------|-----------------------|
| Pt/C                                        | 0                              | 21                         | 0.945                           | 21                                     | /                     |
| Mo <sub>2</sub> C-W <sub>2</sub> C/RGO-0.56 | 30                             | 81                         | 0.428                           | 56                                     | 5.9                   |
| Mo <sub>2</sub> C/RGO                       | 43                             | 110                        | 0.384                           | 73                                     | 11.3                  |
| W <sub>2</sub> C/RGO                        | 67                             | 151                        | 0.278                           | 94                                     | 33.1                  |
| RGO                                         | 278                            | 380                        | 0.005                           | 104                                    | 4040                  |

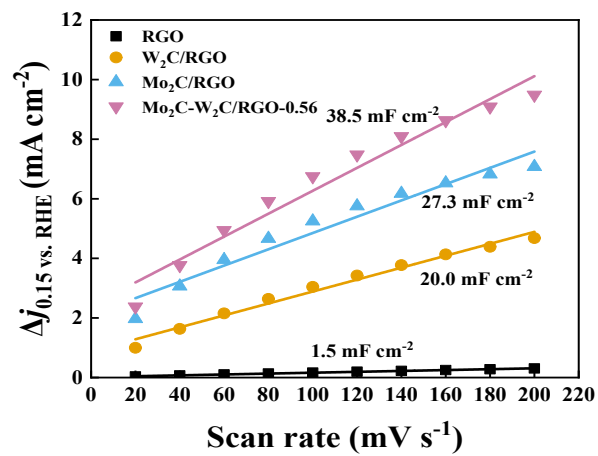

**Fig. S6** The  $C_{dl}$  of different materials obtained at 0.15 V versus RHE in 0.5 M H<sub>2</sub>SO<sub>4</sub>.

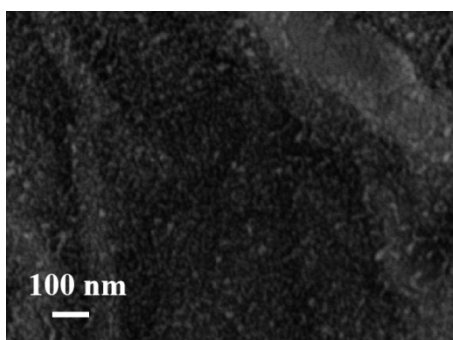

**Fig. S7** SEM image of Mo<sub>2</sub>C-W<sub>2</sub>C/RGO-0.56 after long-term durability test in 0.5 M H<sub>2</sub>SO<sub>4</sub>.

**Table S5.** Comparison of catalytic parameters of different HER catalysts in 1.0 M KOH.

| Catalyst                                    | Onset potential<br>(mV vs RHE) | $\eta_{10}$<br>(mV vs RHE) | $j_0$<br>(mA cm <sup>-2</sup> ) | Tafel slope<br>(mV dec <sup>-1</sup> ) | $R_{ct}$ ( $\Omega$ ) |
|---------------------------------------------|--------------------------------|----------------------------|---------------------------------|----------------------------------------|-----------------------|
| Pt/C                                        | 8                              | 27                         | 0.933                           | 41                                     | /                     |
| Mo <sub>2</sub> C-W <sub>2</sub> C/RGO-0.56 | 33                             | 87                         | 0.398                           | 59                                     | 4.4                   |
| Mo <sub>2</sub> C/RGO                       | 66                             | 134                        | 0.120                           | 64                                     | 6.5                   |
| W <sub>2</sub> C/RGO                        | 76                             | 159                        | 0.102                           | 93                                     | 27.9                  |
| RGO                                         | 296                            | 491                        | 0.0316                          | 189                                    | 279.7                 |

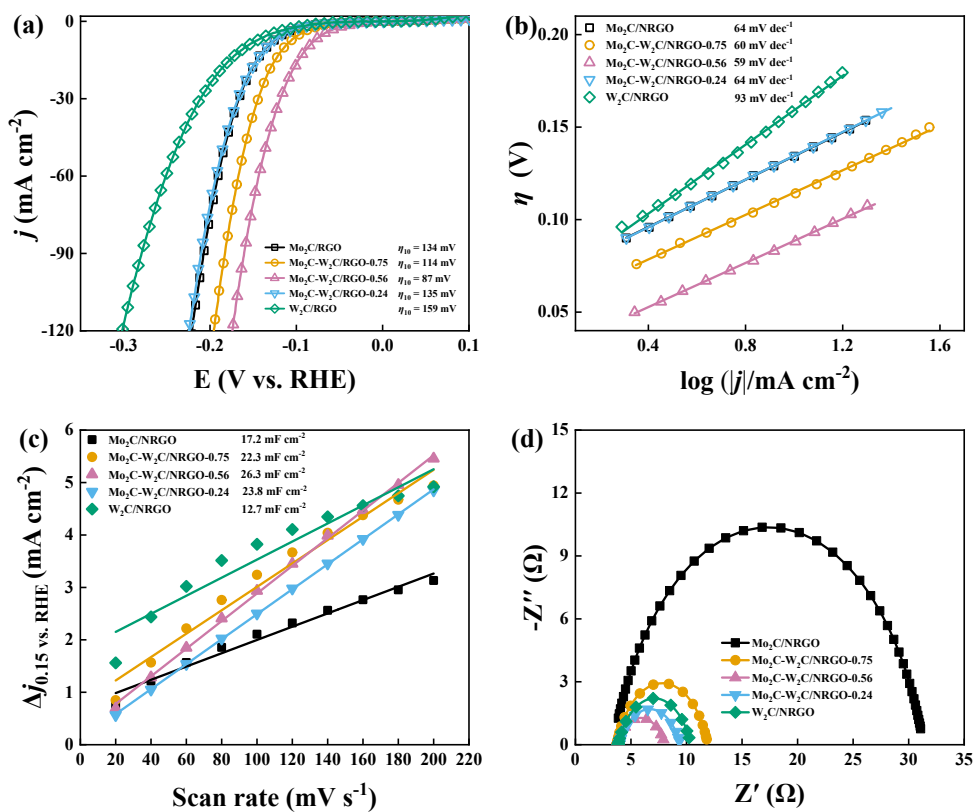

**Fig. S8** (a) Polarization curves and (b) Tafel plots of Mo<sub>2</sub>C/NRGO, Mo<sub>2</sub>C-W<sub>2</sub>C/RGO-0.24, Mo<sub>2</sub>C-W<sub>2</sub>C/RGO-0.56, Mo<sub>2</sub>C-W<sub>2</sub>C/RGO-0.75, and W<sub>2</sub>C/RGO in 1.0 M KOH. (c) The  $C_{dl}$  of different materials obtained at 0.15 V versus RHE. (d) Nyquist plots (at  $\eta = 200$  mV).

**Table S6.** Comparison of catalytic parameters of Mo<sub>2</sub>C/RGO, Mo<sub>2</sub>C-W<sub>2</sub>C/RGO-0.75, Mo<sub>2</sub>C-W<sub>2</sub>C/RGO-0.56, Mo<sub>2</sub>C-W<sub>2</sub>C/RGO-0.24, and W<sub>2</sub>C/NRGO catalysts in 1.0 M KOH.

| Catalysts                                   | Onset potential<br>(mV vs RHE) | $\eta_{10}$<br>(mV vs RHE) | $j_0$<br>(mA cm <sup>-2</sup> ) | Tafel slope<br>(mV dec <sup>-1</sup> ) | $C_{dl}$<br>(mF dec <sup>-1</sup> ) | $R_{ct}$<br>( $\Omega$ ) |
|---------------------------------------------|--------------------------------|----------------------------|---------------------------------|----------------------------------------|-------------------------------------|--------------------------|
| Mo <sub>2</sub> C/RGO                       | 66                             | 134                        | 0.112                           | 64                                     | 17.2                                | 6.5                      |
| Mo <sub>2</sub> C-W <sub>2</sub> C/RGO-0.75 | 56                             | 114                        | 0.184                           | 60                                     | 22.3                                | 5.5                      |
| Mo <sub>2</sub> C-W <sub>2</sub> C/RGO-0.56 | 33                             | 87                         | 0.398                           | 59                                     | 26.3                                | 4.4                      |
| Mo <sub>2</sub> C-W <sub>2</sub> C/RGO-0.24 | 69                             | 135                        | 0.132                           | 64                                     | 23.8                                | 8.2                      |
| W <sub>2</sub> C/NRGO                       | 76                             | 159                        | 0.102                           | 93                                     | 12.7                                | 27.9                     |

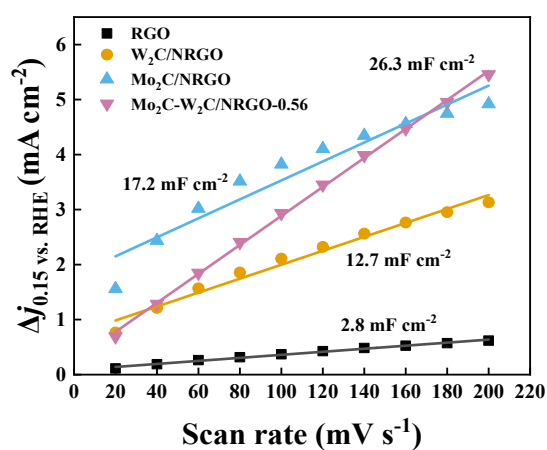

**Fig. S9** The  $C_{dl}$  of different materials obtained at 0.15 V versus RHE in 1.0 M KOH.

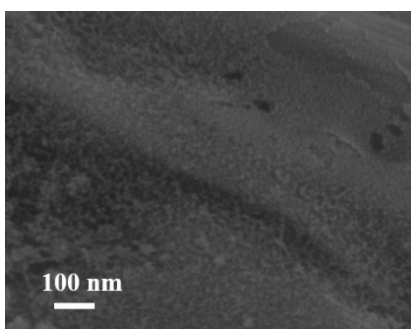

**Fig. S10** SEM image of  $\text{Mo}_2\text{C-W}_2\text{C/RGO-0.56}$  after long-term durability test in 1.0 M KOH.

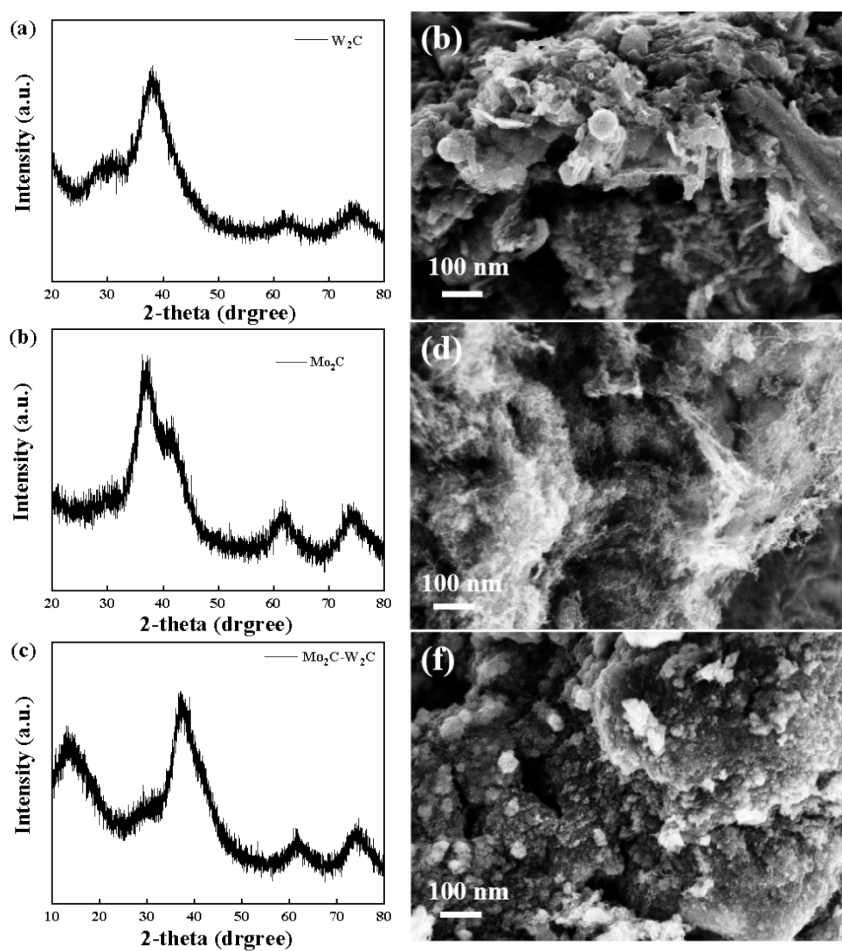

**Fig. S11** (a) XRD pattern and (b) SEM image of  $\text{W}_2\text{C}$ . (c) XRD pattern and (d) SEM image of  $\text{Mo}_2\text{C}$ . (e) XRD pattern and (f) SEM image of  $\text{Mo}_2\text{C-W}_2\text{C}$ .

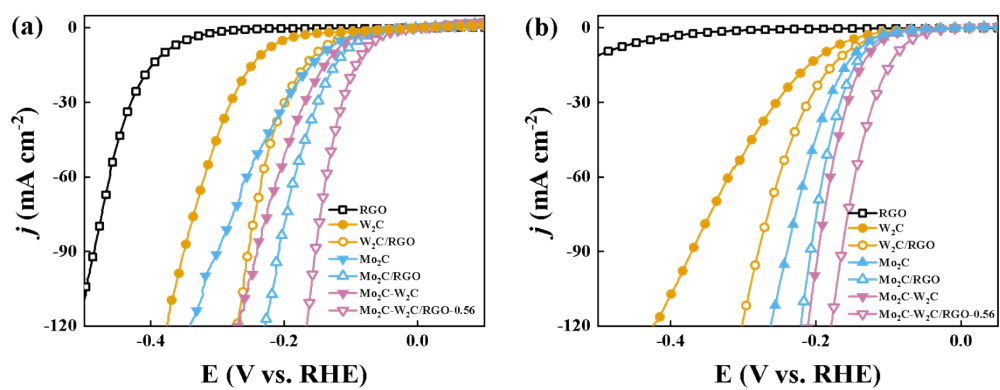

**Fig. S12** (a) Polarization curves of RGO, W<sub>2</sub>C, W<sub>2</sub>C/RGO, Mo<sub>2</sub>C, Mo<sub>2</sub>C/RGO Mo<sub>2</sub>C-W<sub>2</sub>C, and Mo<sub>2</sub>C-W<sub>2</sub>C/RGO-0.56 in 0.5 M H<sub>2</sub>SO<sub>4</sub>. (b) Polarization curves of RGO, W<sub>2</sub>C, W<sub>2</sub>C/RGO, Mo<sub>2</sub>C, Mo<sub>2</sub>C/RGO Mo<sub>2</sub>C-W<sub>2</sub>C, and Mo<sub>2</sub>C-W<sub>2</sub>C/RGO-0.56 in 1.0 M KOH.



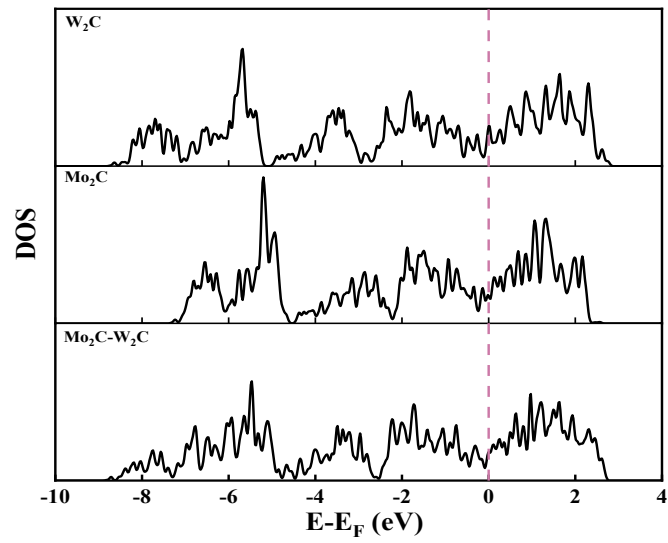

**Fig. S13** The density of states for  $Mo_2C$ ,  $W_2C$ ,  $Mo_2C-W_2C$ . The dashed line denotes the position of the Fermi level.

## REFERENCES

- (1) Z. Kou, T. Wang, H. Wu, L. Zheng, S. Mu, Z. Pan, Z. Lyu, W. Zang, S. J. Pennycook, J. Wang. Twinned Tungsten Carbonitride Nanocrystals Boost Hydrogen Evolution Activity and Stability. *Small*, 2019, 15, 1900248.
- (2) P. Wei, X. Sun, M. Wang, J. Xu, Z. He, X. Li, F. Cheng, Y. Xu, Q. Li, J. Han, H. Yang, Y. Huang. Construction of an N-Decorated Carbon-Encapsulated  $W_2C/WP$  Heterostructure as an Efficient Electrocatalyst for Hydrogen Evolution in Both Alkaline and Acidic Media. *ACS Appl. Mater. Interfaces*, 2021, 13, 53955-53964.
- (3) Y. Hu, B. Yu, W. Li, M. Ramadoss, Y. Chen.  $W_2C$  nanodot-decorated CNT networks as a highly efficient and stable electrocatalyst for hydrogen evolution in acidic and alkaline media. *Nanoscale*, 2019, 11, 4876-4884.
- (4) S. Wu, M. Chen, W. Wang, J. Zhou, X. Tang, D. Zhou, C. Liu. Molybdenum carbide nanoparticles assembling in diverse heteroatoms doped carbon matrix as efficient hydrogen evolution electrocatalysts in acidic and alkaline medium. *Carbon*, 2021, 171, 385-394.
- (5) C. Tyagi, C. Lagrost, V. Dorcet, F. Tessier, B. Fabre. Carbon-Embedded Tungsten Carbide Electrocatalysts Derived from Self-Deposited Tungsten Oxide for the pH-Universal Hydrogen Evolution Reaction. *ACS Appl. Energy Mater.*, 2023, 6, 6842-6850.
- (6) H.-Y. Chen, L. Yang, R.-X. Wang, W.-J. Zhang, R. Liu, Y.-Z. Yun, N. Wang, S. Ramakrishna, L. Jiao, Y.-Z. Long. Constructing  $CoO/Mo_2C$  Heterostructures with Interfacial Electron Redistribution Induced by Work Functions for Boosting Overall

Water Splitting. *Small*, 2023, 2304086.

(7) S. Yuan, M. Xia, Z. Liu, K. Wang, L. Xiang, G. Huang, J. Zhang, N. Li. Dual synergistic effects between Co and Mo<sub>2</sub>C in Co/Mo<sub>2</sub>C heterostructure for electrocatalytic overall water splitting. *Chem. Eng. J.*, 2022, 430, 132697.

(8) H. Yan, Y. Xie, Y. Jiao, A. Wu, C. Tian, X. Zhang, L. Wang, H. Fu. Holey reduced graphene oxide coupled with an Mo<sub>2</sub>N-Mo<sub>2</sub>C heterojunction for efficient hydrogen evolution. *Adv. Mater.*, 2018, 30, 1704156.

(9) X. Xu, H. Ma, W. Xu, X. Liu, H. Chu, L. Zhang, X. Wu. Heterostructure and phase engineering synergistically activated highly efficient alkaline hydrogen evolution in Mo<sub>2</sub>C/MoS<sub>2</sub>-rGO hybrids. *Int. J. Hydrogen Energy.*, 2023, 48, 27557-27567.

(10) S.-C. Sun, F.-X. Ma, H. Jiang, M.-X. Chen, P. Xu, L. Zhen, B. Song, C.-Y. Xu. Encapsulating dual-phase WC-W<sub>2</sub>C nanoparticles into hollow carbon dodecahedrons for all-pH electrocatalytic hydrogen evolution. *Chem. Eng. J.*, 2023, 462, 142132.

(11) T. Gong, J. Zhang, Y. Liu, L. Hou, J. Deng, C. Yuan. Construction of hetero-phase Mo<sub>2</sub>C-CoO@N-CNFs film as a self-supported Bi-functional catalyst towards overall water splitting. *Chem. Eng. J.*, 2023, 451, 139025.

(12) B. Yang, C. G. Wei, X. H. Wang, H. C. Fu, X. H. Chen, Q. Zhang, Y. H. Luo, H. Q. Luo, N. B. Li. Optimization of hydrogen adsorption on W<sub>2</sub>C by late transition metal doping for efficient hydrogen evolution catalysis. *Materials Today Nano*, 2023, 23, 100350.

(13) Y. Li, X. Wu, H. Zhang, J. Zhang. Interface Designing over WS<sub>2</sub>/W<sub>2</sub>C for

Enhanced Hydrogen Evolution Catalysis. ACS Appl. Energy Mater., 2018, 1, 3377-3384.

(14) Y. Hu, B. Yu, M. Ramadoss, W. Li, D. Yang, B. Wang, Y. Chen. Scalable Synthesis of Heterogeneous W-W<sub>2</sub>C Nanoparticle-Embedded CNT Networks for Boosted Hydrogen Evolution Reaction in Both Acidic and Alkaline Media. ACS Sustainable Chem. Eng., 2019, 7, 11, 10016-10024.
